# Supplementary material for: Lidocaine Pharmaceutical Multicomponent Forms: A Story about the Role of Chloride Ions on Their Stability
Source: MDPI journal article supplement (doi:10.3390/cryst12060798), 2022-06-06
Supplement: s1 [file s1]

# Lidocaine Pharmaceutical Multicomponent Forms: a story about the role of chloride ions on their stability

## SUPPLEMENTARY INFORMATION

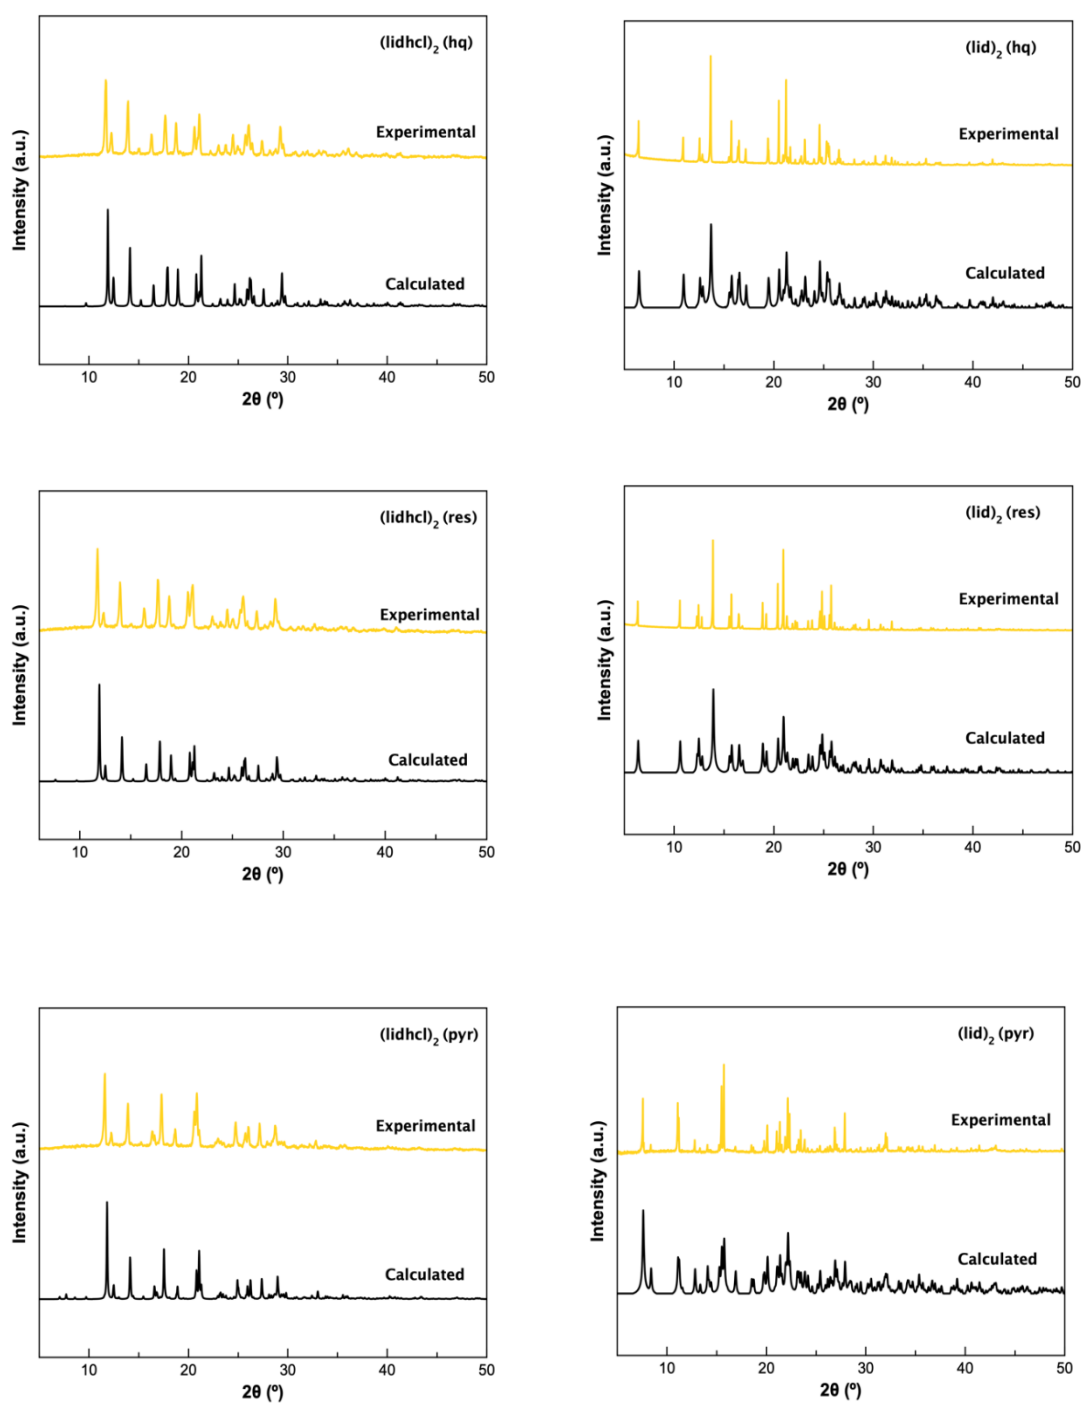

Figure S1 Calculated vs experimental PXR D patterns for the six new phases.

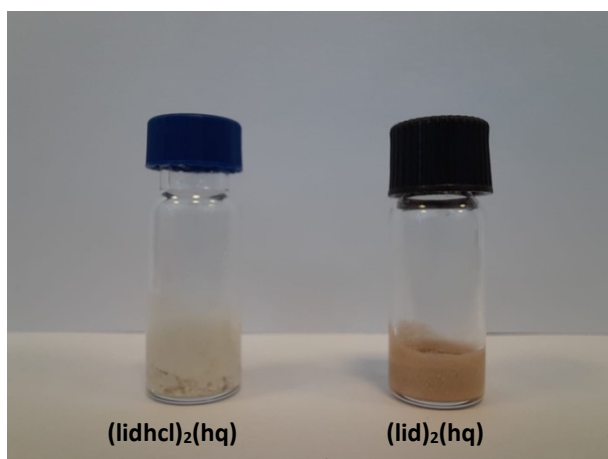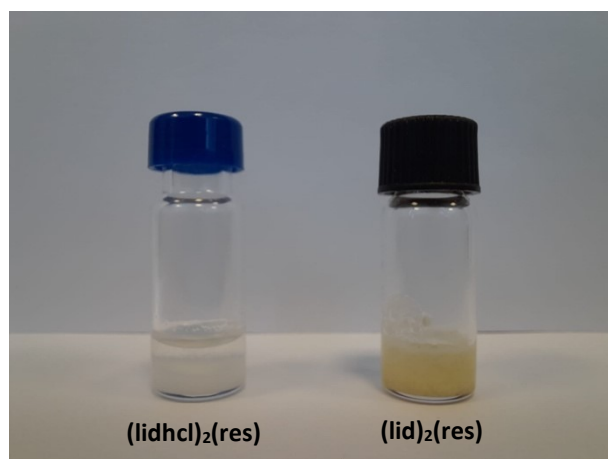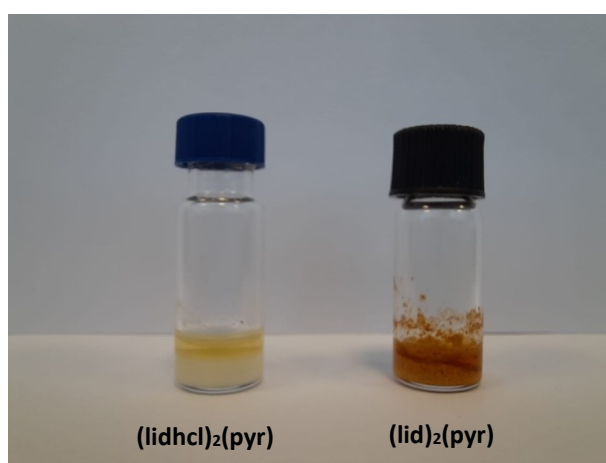

Figure S2 (lidhcl) vs (lid) new phases visual comparative slurry stabilities. Left (lidhcl) forms, right (lid) forms.
