# Supplementary material for: Lidocaine Pharmaceutical Multicomponent Forms: A Story about the Role of Chloride Ions on Their Stability
Source: MDPI journal article supplement (doi:10.3390/cryst12060798), 2022-06-06
Supplement: s1 [file s1]

Archive with 1 entries (1 files):
- crystals-1750772-supplementary.pdf
